# Supplementary material for: Live cell tracking of symmetry break in actin cytoskeleton triggered by abrupt changes in micromechanical environments
Source: Royal Society of Chemistry journal article supplement (doi:10.1039/c5bm00205b), 2015-01-01
Supplement: c5bm00205b1.pdf [file c5bm00205b1.pdf]

Supporting Information (Inoue, et al.)

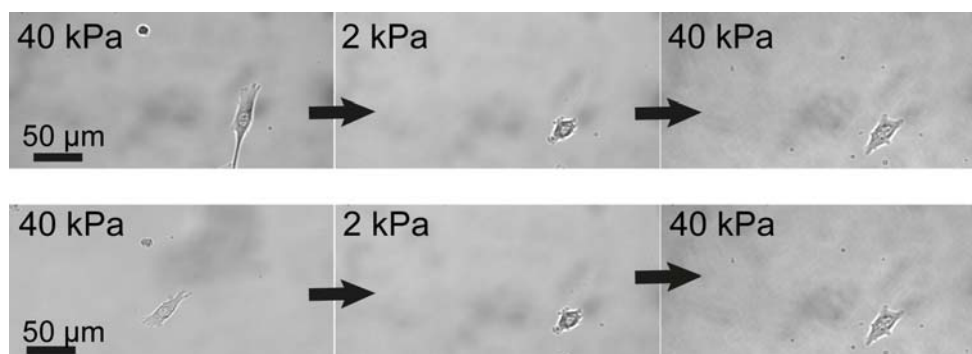

Fig. S1: Bright field image of C2C12 cells that experienced changes in substrate elasticity from  $E = 40 \text{ kPa} \rightarrow 2 \text{ kPa} \rightarrow 40 \text{ kPa}$ . To confirm the reproducibility, two independent series of experiments were presented in upper and lower rows.
